# Supplementary material for: Scinderin Is a Novel Oncogene for Its Correlates with Poor Prognosis, Immune Infiltrates and Matrix Metalloproteinase-2/9 (MMP2/9) in Glioma
Source: MDPI journal article supplement (doi:10.3390/brainsci12101415), 2022-10-20
Supplement: s1 [file s1]

**Table S1.** The top 200 SCIN-related genes in LGG and GBM.

| Gene Symbol  | Gene ID            | PCC  |
|--------------|--------------------|------|
| NCKAP1L      | ENSG00000123338.12 | 0.88 |
| FYB          | ENSG00000082074.15 | 0.86 |
| VAV1         | ENSG00000141968.7  | 0.86 |
| SASH3        | ENSG00000122122.9  | 0.85 |
| PIK3AP1      | ENSG00000155629.14 | 0.85 |
| SYK          | ENSG00000165025.14 | 0.84 |
| DAPP1        | ENSG00000070190.12 | 0.84 |
| LILRB1       | ENSG00000104972.14 | 0.84 |
| DOCK2        | ENSG00000134516.15 | 0.83 |
| SLC2A5       | ENSG00000142583.17 | 0.83 |
| HCK          | ENSG00000101336.12 | 0.83 |
| PLCG2        | ENSG00000197943.9  | 0.83 |
| APBB1IP      | ENSG00000077420.15 | 0.83 |
| KCNK13       | ENSG00000152315.4  | 0.83 |
| ARHGAP30     | ENSG00000186517.13 | 0.83 |
| LPAR5        | ENSG00000184574.9  | 0.82 |
| SNX20        | ENSG00000167208.14 | 0.82 |
| WAS          | ENSG00000015285.10 | 0.81 |
| CD4          | ENSG00000010610.9  | 0.81 |
| FCGR3A       | ENSG00000203747.9  | 0.81 |
| GPR160       | ENSG00000173890.16 | 0.81 |
| MYO1F        | ENSG00000142347.16 | 0.81 |
| SAMSN1       | ENSG00000155307.17 | 0.8  |
| IL16         | ENSG00000172349.16 | 0.8  |
| RP11-750H9.5 | ENSG00000255197.5  | 0.8  |
| HAVCR2       | ENSG00000135077.8  | 0.8  |
| LILRB4       | ENSG00000186818.12 | 0.8  |
| PTPRC        | ENSG00000081237.18 | 0.8  |
| LYN          | ENSG00000254087.7  | 0.8  |
| RCSD1        | ENSG00000198771.10 | 0.8  |
| ITGB2        | ENSG00000160255.16 | 0.8  |
| ADGRE1       | ENSG00000174837.14 | 0.79 |
| GPSM3        | ENSG00000213654.9  | 0.79 |
| LILRA1       | ENSG00000104974.10 | 0.79 |
| CYTH4        | ENSG00000100055.20 | 0.79 |
| CYBB         | ENSG00000165168.7  | 0.79 |
| CD53         | ENSG00000143119.12 | 0.79 |
| SPI1         | ENSG00000066336.11 | 0.79 |
| ADAP2        | ENSG00000184060.10 | 0.79 |
| AIF1         | ENSG00000204472.12 | 0.79 |
| TMEM106A     | ENSG00000184988.8  | 0.78 |
| ABI3         | ENSG00000108798.8  | 0.78 |
| C1QC         | ENSG00000159189.11 | 0.78 |
| RPS6KA1      | ENSG00000117676.13 | 0.78 |
| HCLS1        | ENSG00000180353.10 | 0.78 |
| CEACAM21     | ENSG00000007129.17 | 0.78 |
| LAPTM5       | ENSG00000162511.7  | 0.78 |
| LINC01146    | ENSG00000258867.5  | 0.78 |

---

|               |                    |      |
|---------------|--------------------|------|
| HLA-DOA       | ENSG00000204252.12 | 0.77 |
| CORO1A        | ENSG00000102879.15 | 0.77 |
| LAT2          | ENSG00000086730.16 | 0.77 |
| KCNQ1         | ENSG00000053918.15 | 0.77 |
| JAK3          | ENSG00000105639.18 | 0.77 |
| C1QB          | ENSG00000173369.15 | 0.77 |
| CTD-3128G10.7 | ENSG00000276980.1  | 0.77 |
| DOCK8         | ENSG00000107099.15 | 0.77 |
| PIK3CG        | ENSG00000105851.10 | 0.77 |
| PTAFR         | ENSG00000169403.11 | 0.77 |
| DENND3        | ENSG00000105339.10 | 0.77 |
| LAIR1         | ENSG00000167613.15 | 0.77 |
| CSF1R         | ENSG00000182578.13 | 0.77 |
| TLR1          | ENSG00000174125.7  | 0.77 |
| TLR7          | ENSG00000196664.4  | 0.76 |
| BTK           | ENSG00000010671.15 | 0.76 |
| POU2F2        | ENSG00000028277.20 | 0.76 |
| BIN2          | ENSG00000110934.10 | 0.76 |
| RGS18         | ENSG00000150681.9  | 0.76 |
| SIGLEC9       | ENSG00000129450.8  | 0.76 |
| FCGR1C        | ENSG00000265531.3  | 0.76 |
| DEF6          | ENSG00000023892.10 | 0.76 |
| NLRC4         | ENSG00000091106.18 | 0.76 |
| ST6GAL1       | ENSG00000073849.14 | 0.75 |
| DOK3          | ENSG00000146094.13 | 0.75 |
| TLR6          | ENSG00000174130.12 | 0.75 |
| IL12RB1       | ENSG00000096996.15 | 0.75 |
| TBXAS1        | ENSG00000059377.15 | 0.75 |
| TM6SF1        | ENSG00000136404.15 | 0.75 |
| IKZF1         | ENSG00000185811.16 | 0.75 |
| GIMAP4        | ENSG00000133574.9  | 0.75 |
| SLCO2B1       | ENSG00000137491.14 | 0.75 |
| TNFRSF1B      | ENSG00000028137.16 | 0.75 |
| STXBP2        | ENSG00000076944.14 | 0.75 |
| HLA-DMA       | ENSG00000204257.14 | 0.75 |
| SLA           | ENSG00000155926.13 | 0.75 |
| WDFY4         | ENSG00000128815.17 | 0.75 |
| C16orf54      | ENSG00000185905.3  | 0.74 |
| FPR1          | ENSG00000171051.8  | 0.74 |
| RHBDF2        | ENSG00000129667.12 | 0.74 |
| NAGA          | ENSG00000198951.11 | 0.74 |
| ALOX5         | ENSG00000012779.10 | 0.74 |
| CCR1          | ENSG00000163823.3  | 0.74 |
| ARHGDIB       | ENSG00000111348.8  | 0.74 |
| TLR2          | ENSG00000137462.6  | 0.74 |
| TMC8          | ENSG00000167895.14 | 0.74 |
| C3AR1         | ENSG00000171860.4  | 0.74 |
| MNDA          | ENSG00000163563.7  | 0.74 |
| MGAT4A        | ENSG00000071073.12 | 0.74 |
| ITGAL         | ENSG00000005844.17 | 0.74 |
| CCR5          | ENSG00000160791.13 | 0.74 |

---

|              |                    |      |
|--------------|--------------------|------|
| CD68         | ENSG00000129226.13 | 0.74 |
| RP11-153M7.1 | ENSG00000248208.1  | 0.74 |
| LHFPL2       | ENSG00000145685.13 | 0.74 |
| FAM177B      | ENSG00000197520.10 | 0.74 |
| ARL11        | ENSG00000152213.3  | 0.74 |
| RASGRP4      | ENSG00000171777.15 | 0.74 |
| EBI3         | ENSG00000105246.5  | 0.74 |
| TNFAIP8L2    | ENSG00000163154.5  | 0.74 |
| UCP2         | ENSG00000175567.8  | 0.74 |
| PCED1B-AS1   | ENSG00000247774.6  | 0.73 |
| SIRPB2       | ENSG00000196209.12 | 0.73 |
| DENND1C      | ENSG00000205744.9  | 0.73 |
| FCGR1A       | ENSG00000150337.13 | 0.73 |
| PARVG        | ENSG00000138964.16 | 0.73 |
| TLR10        | ENSG00000174123.10 | 0.73 |
| FCGR1B       | ENSG00000198019.12 | 0.73 |
| MILR1        | ENSG00000271605.5  | 0.73 |
| LY86         | ENSG00000112799.8  | 0.73 |
| TLR5         | ENSG00000187554.11 | 0.73 |
| LPCAT2       | ENSG00000087253.11 | 0.73 |
| CD84         | ENSG00000066294.14 | 0.73 |
| PLB1         | ENSG00000163803.12 | 0.73 |
| ADORA3       | ENSG00000282608.1  | 0.73 |
| SIGLEC10     | ENSG00000142512.14 | 0.73 |
| CD86         | ENSG00000114013.15 | 0.73 |
| GNGT2        | ENSG00000167083.6  | 0.72 |
| CD37         | ENSG00000104894.11 | 0.72 |
| CD300C       | ENSG00000167850.3  | 0.72 |
| CD74         | ENSG00000019582.14 | 0.72 |
| GPR65        | ENSG00000140030.5  | 0.72 |
| IL10RA       | ENSG00000110324.9  | 0.72 |
| GPR132       | ENSG00000183484.11 | 0.72 |
| CD300A       | ENSG00000167851.13 | 0.72 |
| HLA-DMB      | ENSG00000242574.8  | 0.72 |
| ARHGAP9      | ENSG00000123329.17 | 0.72 |
| RNASE3       | ENSG00000169397.3  | 0.72 |
| CSF2RB       | ENSG00000100368.13 | 0.72 |
| PLXDC2       | ENSG00000120594.16 | 0.72 |
| RP11-83C7.1  | ENSG00000248227.1  | 0.72 |
| RGS19        | ENSG00000171700.13 | 0.72 |
| FAM78A       | ENSG00000126882.12 | 0.71 |
| LRRC25       | ENSG00000175489.9  | 0.71 |
| CD14         | ENSG00000170458.13 | 0.71 |
| AC011899.9   | ENSG00000233038.5  | 0.71 |
| LGALS9       | ENSG00000168961.16 | 0.71 |
| HLA-DRA      | ENSG00000204287.13 | 0.71 |
| EVI2B        | ENSG00000185862.6  | 0.71 |
| LCP1         | ENSG00000136167.13 | 0.71 |
| CD226        | ENSG00000150637.8  | 0.71 |
| CEBPA        | ENSG00000245848.2  | 0.71 |
| C1QA         | ENSG00000173372.16 | 0.71 |

|              |                    |      |
|--------------|--------------------|------|
| RIPK3        | ENSG00000129465.15 | 0.71 |
| ATP8B4       | ENSG00000104043.14 | 0.71 |
| TRAF3IP3     | ENSG00000009790.14 | 0.7  |
| CTC-378H22.1 | ENSG00000254887.1  | 0.7  |
| IRF5         | ENSG00000128604.18 | 0.7  |
| ITGAM        | ENSG00000169896.16 | 0.7  |
| FERMT3       | ENSG00000149781.12 | 0.7  |
| GPR34        | ENSG00000171659.13 | 0.7  |
| CASP5        | ENSG00000137757.10 | 0.7  |
| HLA-DPA1     | ENSG00000231389.7  | 0.7  |
| AC098823.3   | ENSG00000226125.1  | 0.7  |
| CYFIP1       | ENSG00000273749.4  | 0.7  |
| RP11-23J18.1 | ENSG00000258352.1  | 0.7  |
| IL21R        | ENSG00000103522.15 | 0.7  |
| RNASET2      | ENSG00000026297.15 | 0.7  |
| RP11-153M7.3 | ENSG00000250771.2  | 0.7  |
| NFAM1        | ENSG00000235568.6  | 0.69 |
| EMB          | ENSG00000170571.11 | 0.69 |
| NCF4         | ENSG00000100365.14 | 0.69 |
| TMEM119      | ENSG00000183160.8  | 0.69 |
| SCIMP        | ENSG00000161929.14 | 0.69 |
| AOAH         | ENSG00000136250.11 | 0.69 |
| PLA2G15      | ENSG00000103066.12 | 0.69 |
| GBGT1        | ENSG00000148288.11 | 0.69 |
| FCER1G       | ENSG00000158869.10 | 0.68 |
| PIK3R5       | ENSG00000141506.13 | 0.68 |
| CYBA         | ENSG00000051523.10 | 0.68 |
| RASAL3       | ENSG00000105122.12 | 0.68 |
| HLA-DRB6     | ENSG00000229391.7  | 0.68 |
| HPGDS        | ENSG00000163106.10 | 0.68 |
| CARD9        | ENSG00000187796.13 | 0.68 |
| CD33         | ENSG00000105383.14 | 0.68 |
| HHEX         | ENSG00000152804.10 | 0.68 |
| RP11-344B5.2 | ENSG00000224307.1  | 0.68 |
| GIMAP6       | ENSG00000133561.15 | 0.68 |
| FAM105A      | ENSG00000145569.5  | 0.68 |
| BATF         | ENSG00000156127.6  | 0.68 |
| RHOH         | ENSG00000168421.12 | 0.68 |
| CIITA        | ENSG00000179583.17 | 0.68 |
| IRF8         | ENSG00000140968.10 | 0.68 |
| TGFBR1       | ENSG00000106799.12 | 0.68 |
| HLA-DPB1     | ENSG00000223865.10 | 0.68 |
| CLEC17A      | ENSG00000187912.11 | 0.68 |
| BLNK         | ENSG00000095585.16 | 0.68 |
| IL6R         | ENSG00000160712.12 | 0.68 |
| GIMAP1       | ENSG00000213203.2  | 0.67 |
| ZC3H12D      | ENSG00000178199.13 | 0.67 |
| LCP2         | ENSG00000043462.11 | 0.67 |
| SYNGR2       | ENSG00000108639.7  | 0.67 |
| AC006129.2   | ENSG00000268027.5  | 0.67 |

Notes: PCC, Pearson correlation coefficient. SCIN, Scinderin. LGG, lower grade glioma. GBM, glioblastoma
